# Supplementary material
Source: PubMed Central journal article supplement (PMC5123758)
Supplement: NIHMS818512-supplement.pdf [file NIHMS818512-supplement.pdf]

**Supplemental Information**  
**Table S1. Oligonucleotides**

| Gene           | GenBank-EMBL number | Primer 1 (forward)       | Primer 2 (reverse)         |
|----------------|---------------------|--------------------------|----------------------------|
| Acaa1a         | NM_130864.3         | TCTCCAGGACGTGAGGCTAAA    | CGCTCAGAAATTGGGCGATG       |
| Acadl          | NM_007381.4         | TCTTTTCTCGGAGCATGACA     | GACCTCTCTACTCACTTCTCCAG    |
| Acadvl         | NM_017366.3         | CTACTGTGCTTCAGGGACAAC    | CAAAGGACTTCGATTCTGCCC      |
| Acc2           | AF290178.2          | TGAATCTCACGCGCCTACTA     | GCCTCTTTCACCAGATGGA        |
| Acox1          | NM_015729.3         | TAACCTTCACTCGAAGCCA      | AGTTCCATGACCCATCTCTGTC     |
| Arg1           | NM_007482.3         | TGGCTTTAACCTTGGCTTGCTCG  | CATGTGGCGCATTACAGTCACTT    |
| Ccl2           | NM_011333.3         | TTAATGCCCACTCACCTGC      | GAGCTTGGTGACAAATACTACAGC   |
| Cd36           | NM_001159558.1      | GGACATTGAGATTCTTTTCTCTG  | GCAAAGGCATTGGCTGGAAGAAC    |
| Cidea          | NM_007702.2         | TGACATTCATGGGATTGCAGAC   | GGCCAGTTGTGATGACTAAGAC     |
| Cideb          | NM_009894.3         | CAATGGCCTGCTAAGGTCAGT    | GATCACAGACACGGAAGGGTC      |
| Cidec          | NM_178373.3         | GATGGACTACGCCATGAAGTC    | GTGCTCACTGCCACATGC         |
| Clec4f         | NM_016751.3         | GAGGCCGAGCTGAACAGAG      | TGTGAAGCCACCACAAAAGAG      |
| Crot           | NM_023733.3         | GAACGGACATTTCACTACCAGG   | CTTCATTTGCGAATGGTTTCACT    |
| Emr1(F4/80)    | U66888.1            | CTTTGGCTATGGGCTTCCAGTC   | GCAAGGAGGACAGAGTTTATCGTG   |
| Fasn           | NM_007988.3         | GGCATCATTGGGCATCCTT      | GCTGCAAGCACAGCCTCTCT       |
| Fgf21          | NM_020013.4         | ATCAGGGAGGATGGAACAGTGG   | AGCTCCATCTGGCTGTTGGCAA     |
| Fitm2          | NM_173397.4         | TCGGTCGTCAAGGAGCTGT      | GAGGACGTTGCGCTTGTTG        |
| G6pc           | NM_008061.4         | CTGCAAGGGAGAAGCTCAGCAA   | GAGGACCAAGGAAGCCACAAT      |
| G6pd           | NM_008062.2         | AGGGAAGAGTTGTACCAAAATGA  | CTTCTTCTGGCCAGGTCAC**      |
| Gpam           | NM_008149.3         | ACAGTTGGCACAATAGACGTTT   | CCTTCCATTTCACTGTTGCAGA     |
| Gys2           | NM_145572.2         | CCAGACAAATCCACCTAGAGC    | GGGCCTGGGATACTTAAAGC       |
| Hsd17b4        | NM_008292.4         | AGGGGACTTCAAGGGAATTGG    | GCCTGCTTCAACTGAATCGTAA     |
| Il10           | NM_010548.2         | CTATGCTGCCTGCTTACTG      | AACCCAAGTAACCCTTAAAGTC     |
| Il1β           | NM_008361.4         | CGACAAAATCCCTGTGGCTT     | GTTTGGGATCCACACTCTCCA      |
| Il6            | NM_031168.2         | TTCTCTCCGCAAGAGACTTCC    | TGTGGTGGTATCCTCTGTGA       |
| Iltgam(Cd11b)  | NM_008401.2         | GATCCGGAAAGTAGTGAGAGAAGT | TCCCACCCCAATTACGTAGC       |
| Iltgax (Cd11c) | NM_021334.2         | ACGTCACTACAAGGAGATGTTGGA | ATCCTATTGCAGAATGCTTCTTTACC |
| Lpin1          | AF180471.1          | CTCCGCTCCCGAGAGAAAG      | TCATGTGCAAAATCCACGGACT     |
| Me1            | NM_001198933.1      | TCAACAAGGACTTGGCTTTTACT  | TGCAGGTCCATTAACAGGAGAT     |
| Mogat2         | NM_177448.4         | CACGGGCTTTACCTCGCTTTTC   | CCTGGACAGAATGTGATCGGCA     |
| Pck1           | NM_011044.2         | ATGTGTGGGCGATGACATT      | AACCCGTTTTCTGGGTTGAT       |
| Pcx            | NM_001162946.1      | CTGAAGTTCCAAACAGTTCGAGG  | CGCACGAAACACTCGGATG        |
| Pdk4           | NM_013743.2         | GCCTTGGGAGAAATGTGTGT     | GAAGGCACTGGCTTTTTGAG       |
| Pdp1           | NM_001098231.1      | ATGCCAGCACCAACTCAACT     | GGGTGTGTACCTCAGACGATT      |
| Pex11a         | NM_011068.1         | GACGCCTTCATCCGAGTCG      | CGGCCTTTGTGACGCTTTAGA      |
| Pklr           | NM_013631.2         | CCAAGAGAAACGAGCTACCCC    | TGGAGCCCCACTTAAAGCAG       |
| Plin1          | NM_175640.2         | GGGACCTGTGAGTGCTTCC      | GTATTGAAGAGCCGGGATCTTTT    |
| Plin2          | NM_007408.3         | GACCTTGTGTCCTCCGCTTAT    | CAACCGCAATTTGTGGCTC        |
| Pnpla2         | NM_001163689.1      | GGATGGCGGCATTTACAGACA    | CAAAGGGTTGGGTTGGTTGAG      |
| Pygl           | NM_133198.2         | CCTATGGCTACGGCATTCTG     | TCTCCAAGGGTTTCCATGC        |
| Slc25a4        | NM_007450.4         | TCGTAGGATGATGATGCAGTCT   | TTGGCTCCTTCATCTTTTGC       |
| Slc25a5        | NM_007451.4         | GATGCCGCTGTGTCTTTC       | TATCTGCCGTGATTTGCTTG       |
| Slc27a1        | NM_011977.3         | CGCTTTCTGCGTATCGTCTG     | GATGCACGGGATCGTGTCT        |
| Slc27a2        | NM_011978.2         | TCCTCCAAGATGTGCGGTAAT    | TAGGTGAGCGTCTCGTCTCG       |
| Tnfα           | D84199.2            | TCCCAGGTTCTTCAAGGG       | GGTGAGGAGCACGTAGTCGG       |

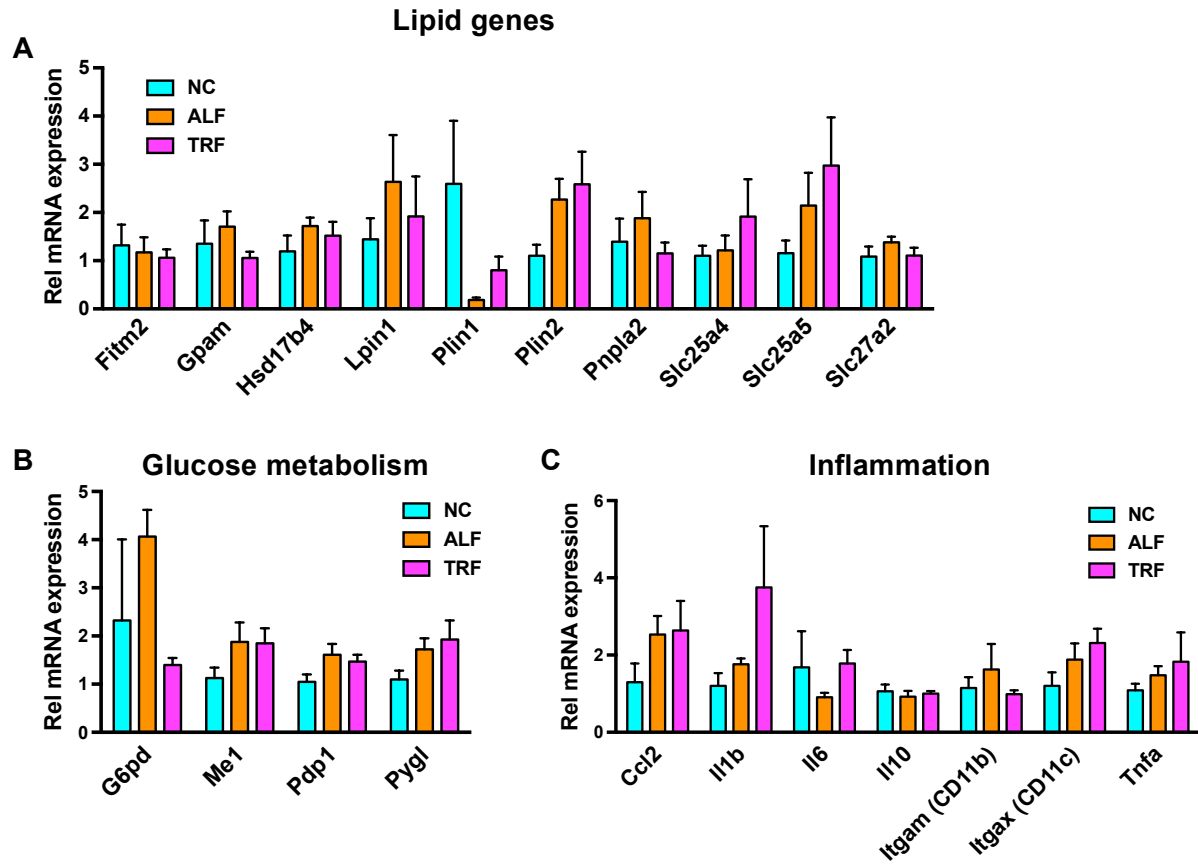

**Figure S1. Liver genes unaltered by TRF.** A. Lipid genes. B. Glucose metabolism genes. C. Inflammation genes.
